# Supplementary material for: High-Glass-Transition Polyesters Produced with Phthalic Anhydride and Epoxides by Ring-Opening Copolymerization (ROCOP)
Source: MDPI journal article supplement (doi:10.3390/polym15132801), 2023-06-24
Supplement: s1 [file s1]

## Supplementary Materials

# High-Glass-Transition Polyesters Produced with Phthalic Anhydride and Epoxides by Ring-Opening Copolymerization (ROCOP)

Selena Silvano <sup>1,2</sup>, Matteo Proverbio <sup>1</sup>, Adriano Vignali <sup>1</sup>, Fabio Bertini <sup>1,\*</sup> and Laura Boggioni <sup>1,\*</sup>

<sup>1</sup> Institute of Chemical Science and Technologies—"G. Natta", National Research Council, via A. Corti 12, 20133 Milan, Italy; selena.silvano@scitec.cnr.it (S.S.); matteo.proverbio@outlook.it (M.P.); adriano.vignali@scitec.cnr.it (A.V.)

<sup>2</sup> National Interuniversity Consortium of Materials Science and Technology, INSTM, Via Giuseppe Giusti 9, 50121 Firenze, Italy

\* Correspondence: laura.boggioni@cnr.it (L.B.); fabio.bertini@scitec.cnr.it (F.B.)

**Figure S1.** SEC elution traces of typical A) poly(LO-*alt*-PA) and B) of poly(VCHO-*alt*-PA).

A)

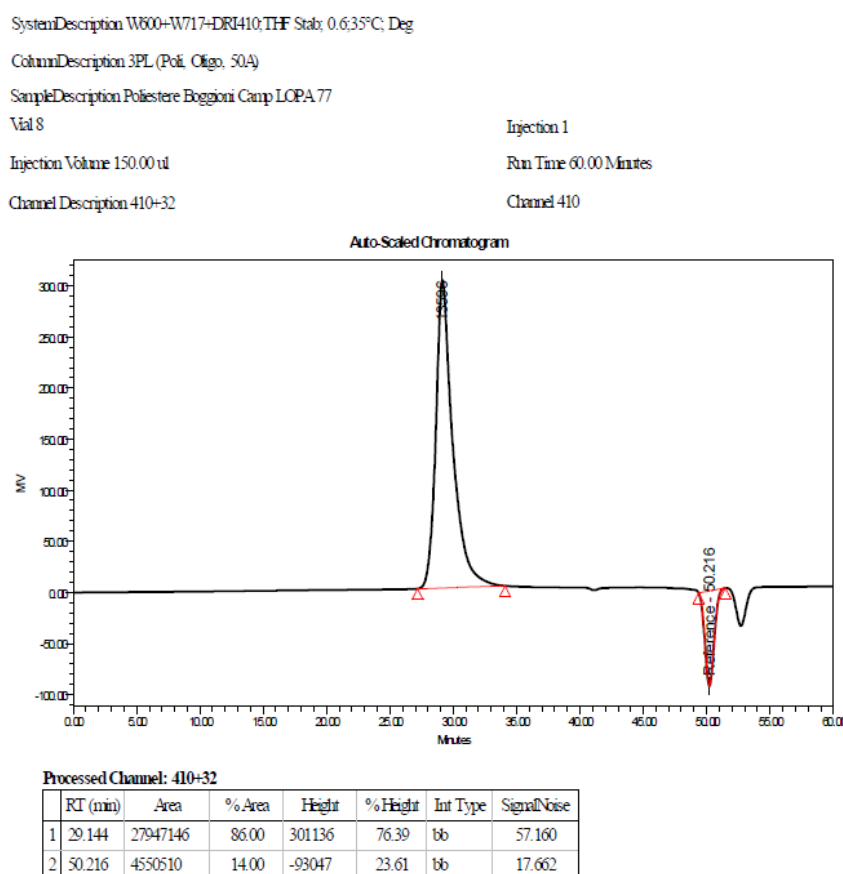

B)

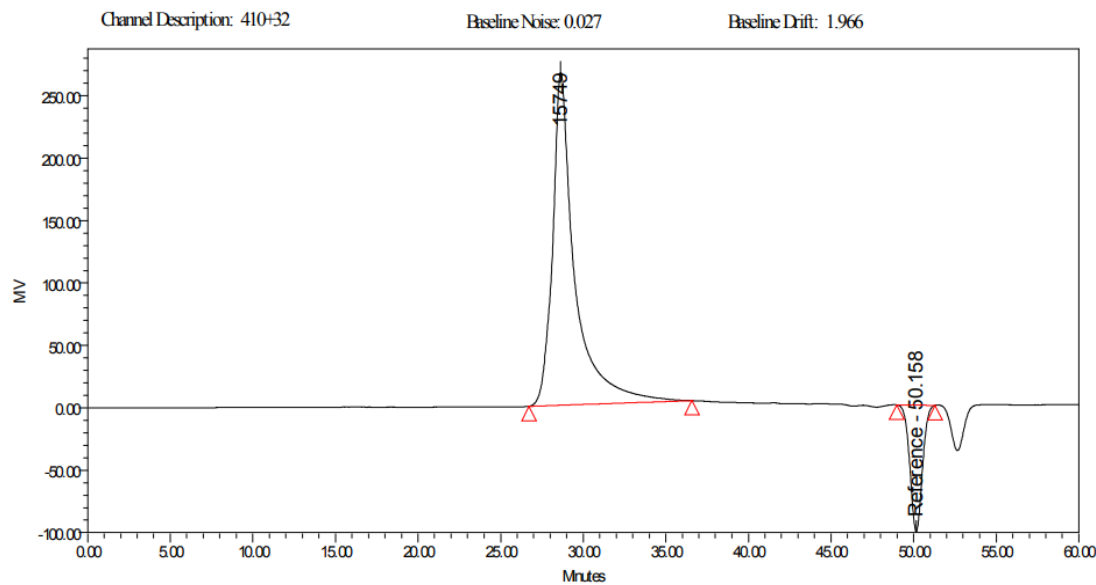

Peak Results

|   | RT     | Area     | %Area | Hight   | %Hight | Int Type | SignalNoise |
|---|--------|----------|-------|---------|--------|----------|-------------|
| 1 | 28.641 | 24998694 | 83.57 | 267062  | 72.53  | tb       | 9780.720    |
| 2 | 50.158 | 4915146  | 16.43 | -101139 | 27.47  | tb       | 3704.070    |

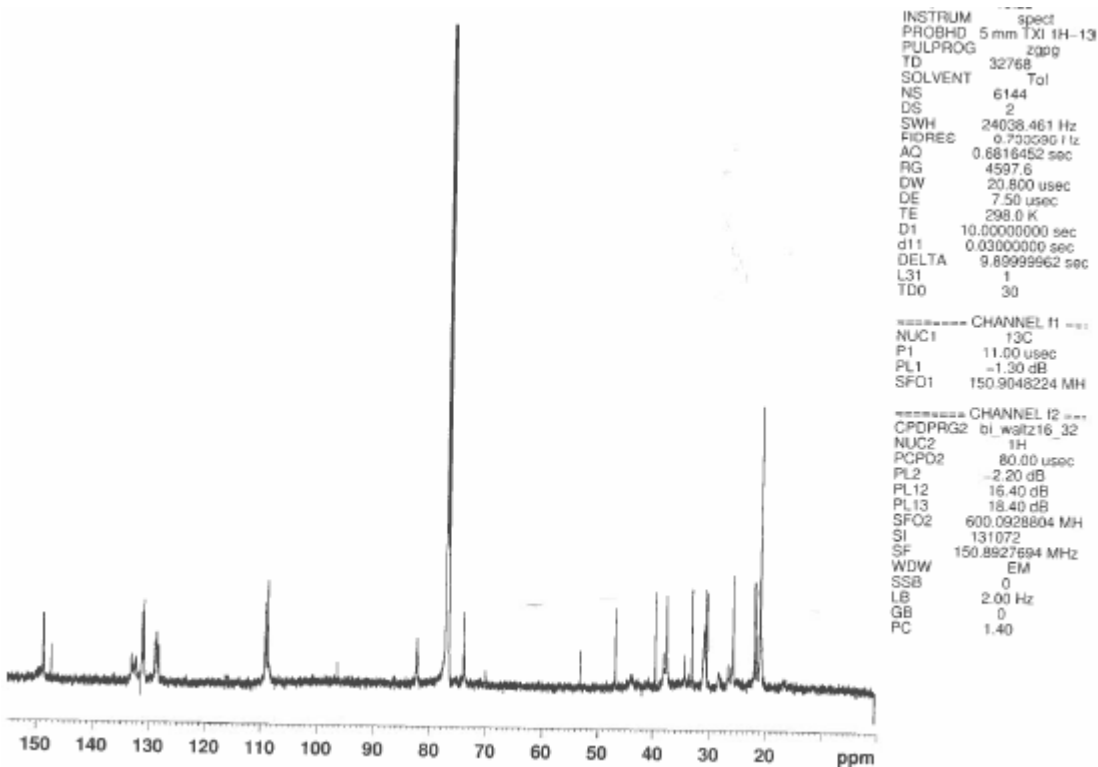

Figure S2. Typical <sup>13</sup>C NMR spectrum of a poly(LO-alt-PA)

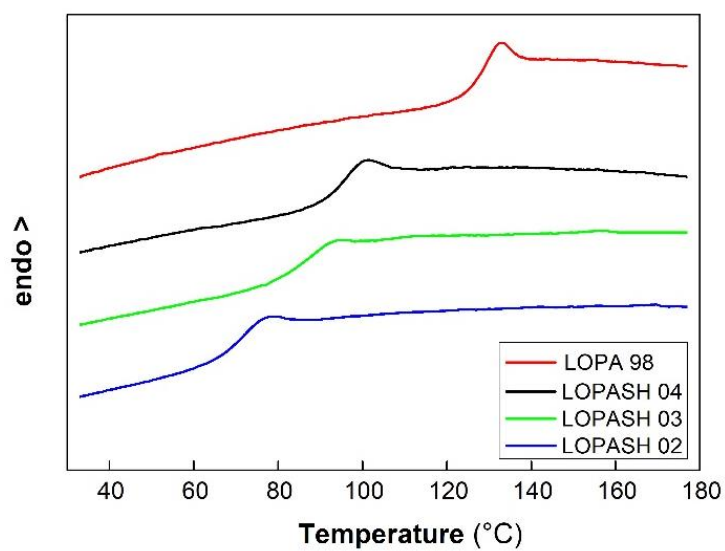

**Figure S3.** DSC heating scans of LOPA 98, LOPASH 04, LOPASH 03 and LOPASH 02.

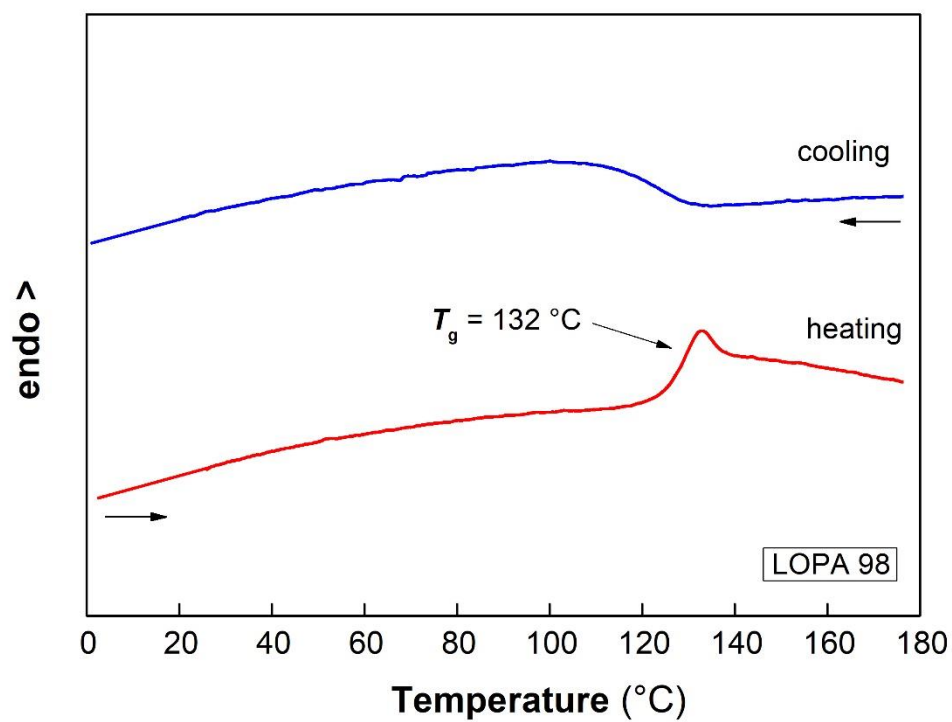

**Figure S4.** DSC thermal cycle of LOPA 98.

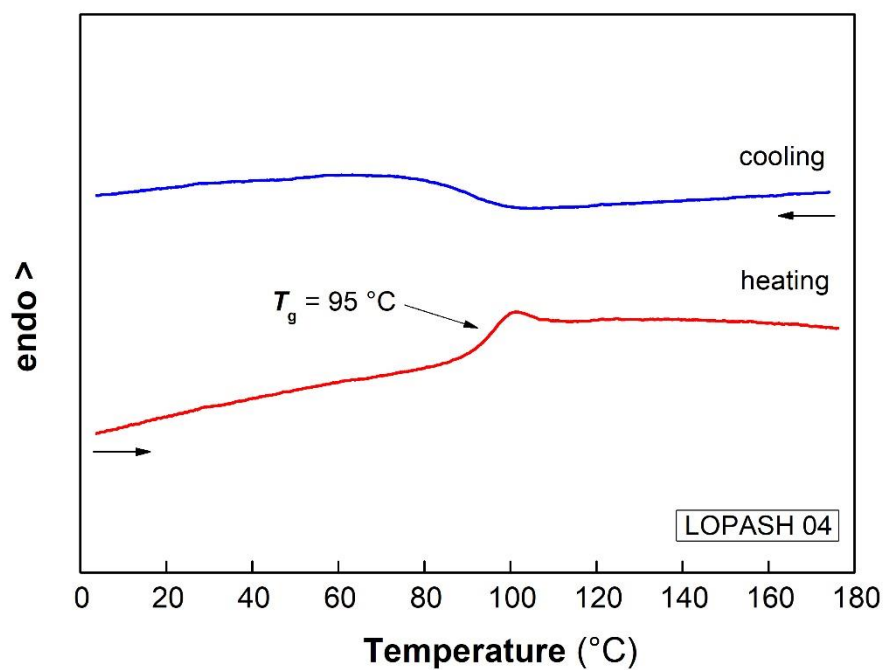

**Figure S5.** DSC thermal cycle of LOPASH 04.

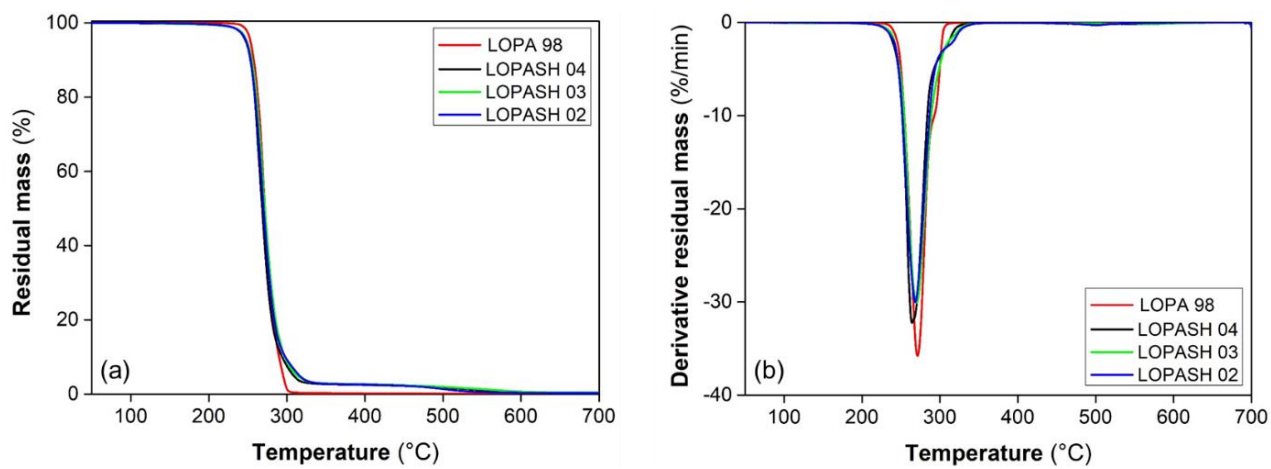

**Figure S6.** TGA (thermogravimetric analysis) (a) and DTG (derivate thermogravimetry) (b) curves under nitrogen flow of LOPA 98, LOPASH 04, LOPASH 03 and LOPASH 02.

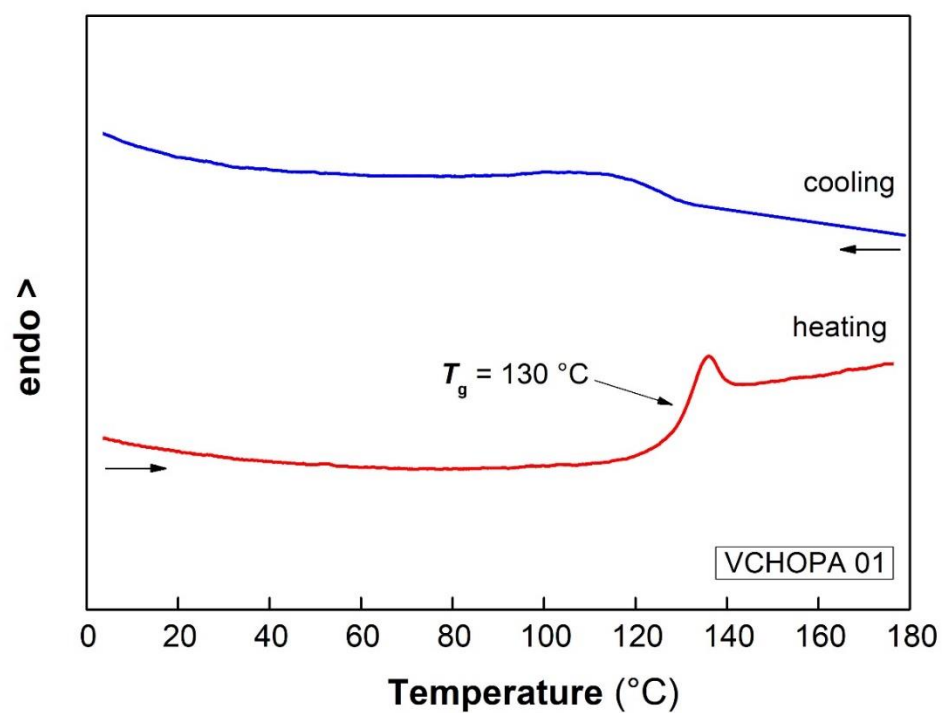

Figure S7. DSC thermal cycle of VCHOPA01.

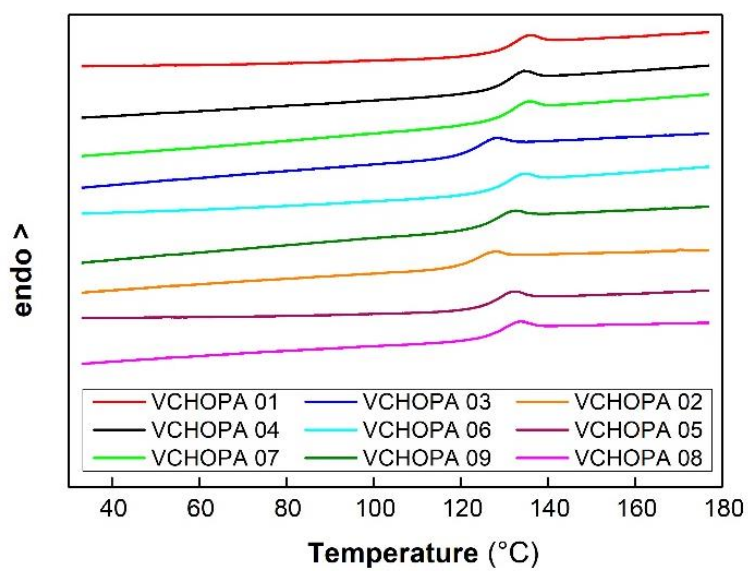

Figure S8. DSC heating scans of poly(VCHO-*alt*-PA) polyesters.
